# Supplementary material for: Understanding the functional role of membrane confinements in TNF-mediated signaling by multiscale simulations
Source: PubMed Central journal article supplement (PMC8917213; doi:10.1038/s42003-022-03179-1), 2022-03-11
Supplement: 42003_2022_3179_MOESM1_ESM.pdf [file 42003_2022_3179_MOESM1_ESM.pdf]

**Understanding the Functional Role of Membrane Confinements in TNF-  
mediated Signaling by Multiscale Simulations**

**Supporting Information**

Zhaoqian Su<sup>1</sup>, Kalyani Dhusia<sup>1</sup>, and Yinghao Wu<sup>1,\*</sup>

<sup>1</sup>Department of Systems and Computational Biology, Albert Einstein College of Medicine, 1300  
Morris Park Avenue, Bronx, NY, 10461, USA

**Table S1:** An overview of the simulated systems.

| <b>System</b>                                | <b>Force Field</b> | <b>Temperature</b> | <b>Time</b> | <b>Number of water molecules</b> | <b>Number of POPC lipids</b> |
|----------------------------------------------|--------------------|--------------------|-------------|----------------------------------|------------------------------|
| <b>TNFR1</b>                                 | CHARMM36m          | 310K               | 400 ns      | 79k                              | 442                          |
| <b>sTNF<math>\alpha</math>-TNFR1 complex</b> | CHARMM36m          | 310K               | 500 ns      | 78k                              | 554                          |
| <b>mTNF<math>\alpha</math></b>               | CHARMM36m          | 310K               | 300 ns      | 75k                              | 554                          |
| <b>mTNF-TNFR1 Complex</b>                    | CHARMM36m          | 310K               | 300 ns      | 188k                             | 1108                         |
| <b>TNFR1-dimer</b>                           | CHARMM36m          | 310K               | 300ns       | 86k                              | 500                          |

**Table S2:** Protein fluctuation and binding parameters for TNFR1 receptor, sTNF $\alpha$ -TNFR1 complex, mTNF $\alpha$  and mTNF $\alpha$  -TNFR1 complex

|                | TNFR1 receptor | sTNF $\alpha$ -TNFR1 complex | mTNF $\alpha$ | mTNF $\alpha$ -TNFR1 complex |
|----------------|----------------|------------------------------|---------------|------------------------------|
| $\Delta h$     | 24 Å           | 13 Å                         | 11 Å          | 5.8Å                         |
| $\Delta\phi$   | 180°           | 55°                          | 31°           | 177°                         |
| $\Delta\theta$ | 40°            | 33°                          | 18°           | 4.8°                         |
| $\Delta\psi$   | 128°           | 54°                          | 32°           | 180°                         |

**Table S3:** Protein fluctuation and binding parameters for monomeric and dimeric TNFR1 receptor

|                 | TNFR1 | TNFR1-dimer |
|-----------------|-------|-------------|
| $\Delta h$      | 12 Å  | 12 Å        |
| $\Delta\varphi$ | 94.3° | 65.2°       |
| $\Delta\theta$  | 20.3° | 14.7°       |
| $\Delta\psi$    | 64.2° | 64.7°       |

**Table S4:** Binding parameters in KMC simulation

|                       | <b>sTNF<math>\alpha</math>-TNFR1</b> | <b>mTNF<math>\alpha</math>-TNFR1</b> |
|-----------------------|--------------------------------------|--------------------------------------|
| R-L Asso Rate         | 0.04                                 | 0.1                                  |
| R-L Diss Rate         | 3.48e-13                             | 3.48e-13                             |
| Monomer Cis Asso Rate | 4.7e-4 ~ 4.7e-6                      | 4.7e-4 ~ 4.7e-6                      |
| Monomer Cis Diss Rate | 1.12e-09 ~ 1.12e-13                  | 1.12e-09 ~ 1.12e-13                  |
| Complex Cis Asso Rate | 9.6e-3 ~ 9.6e-5                      | e-1 ~ e-3                            |
| Complex Cis Diss Rate | 1.12e-09 ~ 1.12e-13                  | 1.12e-09 ~ 1.12e-13                  |

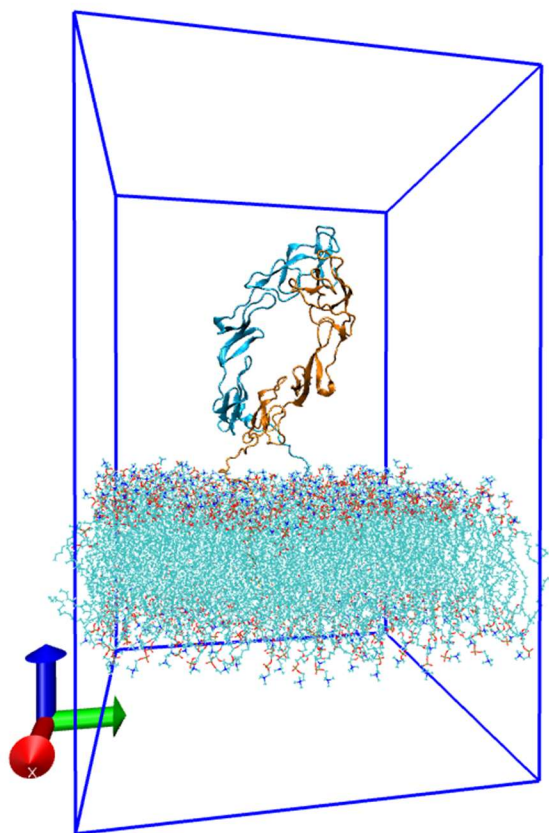

**Figure S1:** the simulation setup for a *cis*-dimer of TNFR1 on lipid bilayer

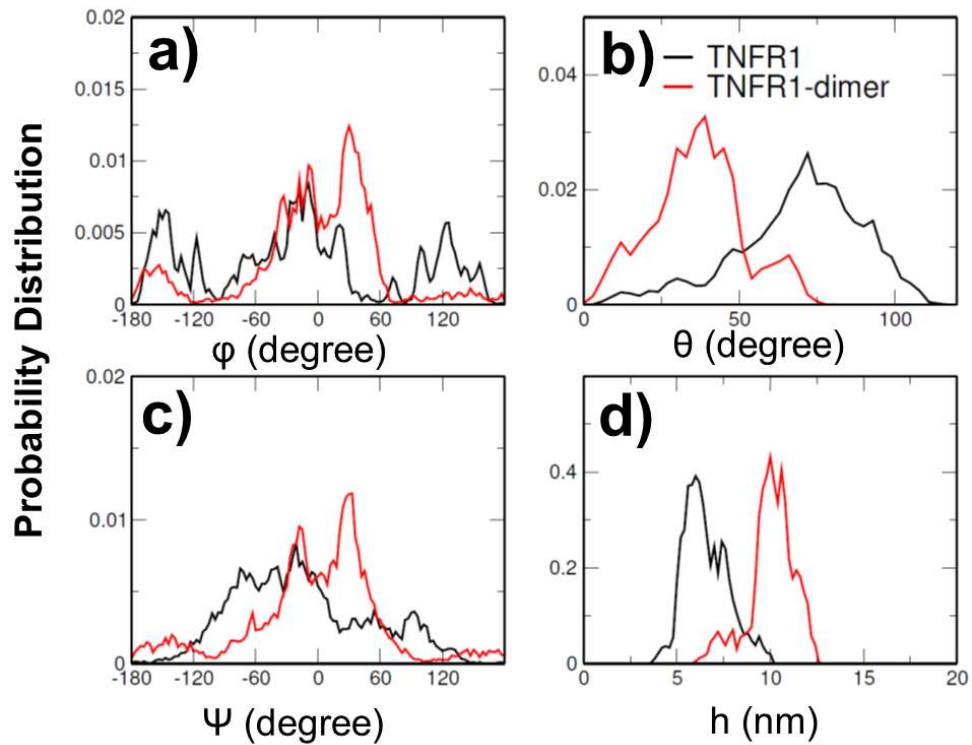

**Figure S2:** the comparison of distributions for all conformational parameters between TNFR1 monomer and TNFR1 *cis*-dimer. As indexed by curves with black for TNFR1 monomer and red for TNFR1 dimer, the distributions of the angle around the long principal axis  $z'$  of the protein  $\psi$  are shown in **(a)**; the distributions of the tilting angle between this principal axis and the membrane normal  $\theta$  are shown in **(b)**; and the distribution of the angle around the membrane normal  $z$   $\phi$  are shown in **(c)**. Similarly, detailed distributions of translational fluctuations are shown in **(d)** for proteins in four modeled systems.

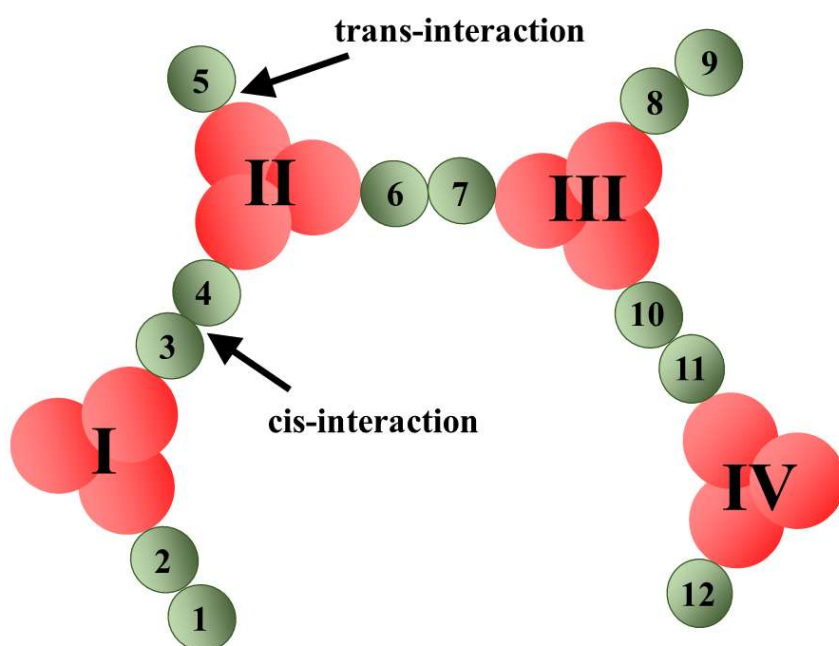

**Figure S3:** the definition about how to calculate the size of a cluster formed through the combination between ligand-receptor *trans*-interactions and receptor-receptor *cis*-interactions



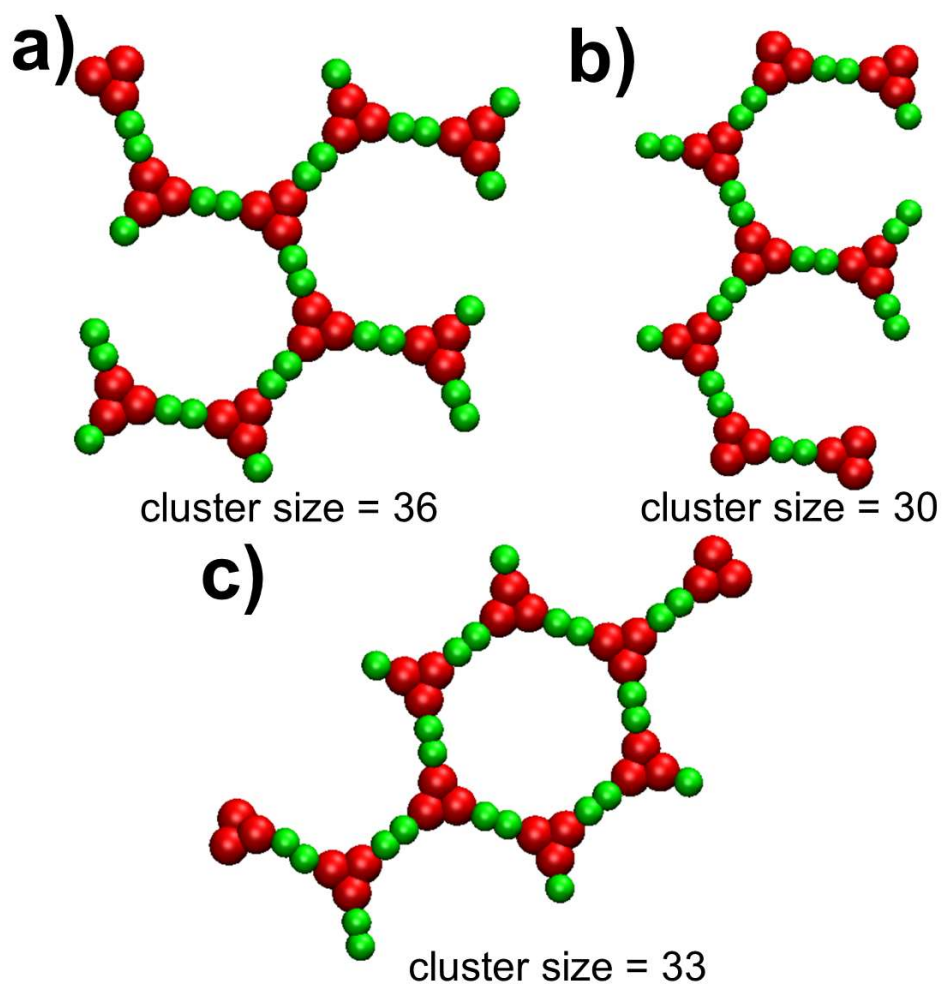

**Figure S4:** representation of larger clusters selected from different trajectories of sTNF $\alpha$ -TNFR1 system. The size of the first selected cluster equals 36, consisting of 9 ligand trimers and 27 receptors, as shown in **(a)**. The size of the second selected cluster equals 30, consisting of 8 ligand trimers and 22 receptors, as shown in **(b)**. The size of the third selected cluster equals 33, consisting of 9 ligand trimers and 24 receptors, as shown in **(c)**. The figure indicates that hexagonal lattice like structures were formed in all three clusters.
